# Supplementary material
Source: Research Square preprint supplement (doi:10.21203/rs.3.rs-8727328/v1)
Supplement: Supplementary file 1 [file 1e89e2d50702de4b013ae7cc.xlsx]

## Sheet: Sheet1
Parameter	Values
Gender
Male [n (%)]	29 (52.7)
Female [n (%)]	26 (47.3)
Age (years)	44.31±10.7
Weight (kg)	74.97±8.77
Statin used & dose
Atorvastatin 40mg [n (%)]	47 (85.45)
Atorvastatin 80 mg [n (%)]	08 (14.55)
Mean dose (mg) of atorvastatin	44.36
