# Supplementary material
Source: Research Square preprint supplement (doi:10.21203/rs.3.rs-8727328/v1)
Supplement: Supplementary file 2 [file 2f0cc2840569efaa21460920.xlsx]

## Sheet: Sheet1
Interval from	SNP	Response category	SNP variants			Total N(%)	p-value
			N(%)
			Wild	Wild heterozygous	Mutant homozygous
			homozygous
Baseline to week 12	ApoA1 rs5069(G>A)	NR	30(75)	1(100)	0(0)	31(75.61)	1
		SR	10(25)	0(0)	0(0)	10(24.39)
		Total N	40	1	0	41
	ApoE rs7412(C>T)	NR	38(77.55)	1(100)	0(0)	39(78)	1
		SR	11(22.45)	0(0)	0(0)	11(22)
		Total N	49	1	0	50
	ApoE rs429358(T>C)	NR	39(78)	0(0)	0(0)	39(75)	0.05
		SR	11(22)	2(100)	0(0)	13(25)
		Total N	50	2	0	52
	PCSK9 rs505151(G>A)	NR	1(100)	7(77.78)	32(74.42)	40(75.47)	1
		SR	0(0)	2(22.22)	11(25.58)	13(24.53)
		Total N	1	9	43	53
	ApoE [rs7412(C>T) +	NR	35(79.55)	1(33.3)	0(0)	36(76.60)	0.13
	rs429358(T>C)]	SR	9 (20.45)	2(66.7)	0(0)	11(23.40)
		Total N	44	3	0	47
	ApoE [rs7412(C>T) +	NR	2(100)	39(78.0)	1(33.33)	42(76.36)	0.18
	rs429358(T>C)] +	SR	0(0)	11(22.0)	2(66.67)	13(23.64)
	ApoA1 rs5069(G>A) + PCSK9 rs505151(G>A)	Total N	2	50	3	55
Baseline to week 4	ApoA1 rs5069(G>A)	NR	11(27.5)	1(100)	0(0)	12(29.27)	0.29
		SR	29(72.5)	0(0)s	0(0)	29(70.73)
		Total N	40	1	0	41
	ApoE rs7412(C>T)	NR	14(28.57)	0(0)	0(0)	14(28)	0.72
		SR	35(71.43)	1(100)	0(0)	36(72)
		Total N	49	1	0	50
	ApoE rs429358(T>C)	NR	14(28)	0(0)	0(0)	14(26.92)	0.53
		SR	36(72)	2(100)	0(0)	38(73.08)
		Total N	50	2	0	52
	PCSK9 rs505151(G>A)	NR	0(0)	1(11.11)	14(32.55)	15(28.3)	0.46
		SR	1(100)	8(88.89)	29(67.45)	38(71.7)
		Total N	1	9	43	53
	ApoE [rs7412(C>T) +	NR	13(29.55)	0(0)	0(0)	13(27.66)	0.36
	rs429358(T>C)]	SR	31(70.45)	3(100)	0(0)	34(72.34)
		Total N	44	3	0	47
	ApoE [rs7412(C>T) +	NR	0(0)	14(28.0)	1(33.33)	15(27.27)	1
	rs429358(T>C)] +	SR	2(100)	36(72.0)	2(66.67)	40(72.73)
	ApoA1 rs5069(G>A) + PCSK9 rs505151(G>A)	Total N	2	50	3	55
Baseline to week 2	ApoE rs7412(C>T)	NR	2(4.17)	0(0)	0(0)	2(4.08)	0.95
		SR	46(95.83)	1(100)	0(0)	47(95.92)
		Total N	48	1	0	49
	ApoE rs429358(T>C)	NR	2(4)	0(0)	0(0)	2(3.85)	0.92
		SR	48(96)	2(100)	0(0)	50(96.15)
		Total N	50	2	0	52
	PCSK9 rs505151(G>A)	NR	0(0)	0(0)	2(4.65)	2(3.77)	1
		SR	1(100)	9(100)	41(95.35)	51(96.23)
		Total N	1	9	43	53
	ApoE [rs7412(C>T) +	NR	2(5.55)	0(0)	0(0)	2(4.25)	0.87
	rs429358(T>C)]	SR	42(95.45)	3(100)	0(0)	45(95.75)
		Total N	44	3	0	47
	ApoE [rs7412(C>T) +	NR	0(0)	2(4.0)	0(0)	2(3.64)	1
	rs429358(T>C)] +	SR	2(100)	48(96.0)	3(100)	53(96.36)
	ApoA1 rs5069(G>A) + PCSK9 rs505151(G>A)	Total N	2	50	3	55
