# Supplementary material
Source: Research Square preprint supplement (doi:10.21203/rs.3.rs-8727328/v1)
Supplement: Supplementary file 3 [file 4e49a07628d6cc69898a48d0.docx]

**Supplementary Table 1: Comparison of Lipid profile of study population (males and females) at week 1, 2, 4, & 12 and serum ApoA1, ApoE & PCSK9 levels at week 0 & 12 (Mean±SD)**

| **Parameters** | **Weeks from baseline** | **Biochemical values (Mean±SD)** | | | |
| --- | --- | --- | --- | --- | --- |
| **Overall**  **(N=55)** | **Male**  **(N=29)** | **Female**  **(N=26)** | **p value** |
| **LDL-C (mg/dL)** | Week 0 | 176.22±43.84 | 177.28±46.85 | 175.04±39.25 | 0.382 |
| Week 1 | 134.13±32.46 | 132.59±33.81 | 135.85±30.13 | 0.666 |
| Week 2 | 114.15±24.83 | 111.45±26.49 | 117.15±21.93 | 0.259 |
| Week 4 | 95.67±22.57 | 97.34±25.41 | 93.81±18.21 | 0.101 |
| Week 12 | 78.64±19.26 | 81.10±20.65 | 75.88±16.74 | 0.245 |
| **TC (mg/dL)** | Week 0 | 265.47±80.21 | 280.17±97.56 | 249.08±47.29 | 0.279 |
| Week 1 | 218.58±39.84 | 222.52±45.82 | 214.19±30.32 | 0.159 |
| Week 2 | 192.33±24.93 | 191.72±27.13 | 193.00±21.65 | 0.192 |
| Week 4 | 168.93±22.00 | 171.21±24.37 | 166.38±18.20 | 0.160 |
| Week 12 | 151.98±20.71 | 155.62±21.04 | 147.92±19.13 | 0.786 |
| **HDL-C (mg/dL)** | Week 0 | 43.55±9.52 | 42.86±8.95 | 44.31±9.89 | 0.213 |
| Week 1 | 44.96±8.93 | 44.41±8.16 | 45.58±9.52 | 0.148 |
| Week 2 | 45.85±8.36 | 45.52±8.04 | 46.23±8.53 | 0.379 |
| Week 4 | 46.67±9.12 | 46.34±8.47 | 47.04±9.63 | 0.182 |
| Week 12 | 47.18±10.15 | 46.45±9.76 | 48±10.32 | 0.479 |
| **TG (mg/dL)** | Week 0 | 261.96±192.70 | 306.41±248.06 | 212.38±61.86 | 0.141 |
| Week 1 | 193.33±105.45 | 211.59±132.85 | 172.96±51.21 | 0.235 |
| Week 2 | 156.36±61.48 | 165.90±74.31 | 145.73±38.45 | 0.257 |
| Week 4 | 130.60±60.20 | 139.41±60.60 | 120.77±56.98 | 0.433 |
| Week 12 | 109.65±41.13 | 121.14±46.56 | 96.85±27.99 | 0.131 |
| **ApoA1 (ng/mL)** | Week 0 | 123.61±30.61 | 121.37±32.04 | 126.12±28.10 | 0.670 |
| Week 12 | 142.95±30.92 | 141.00±33.01 | 145.12±27.59 | 0.389 |
| **ApoE (ng/mL)** | Week 0 | 56.51±15.02 | 58.92±15.15 | 53.82±14.09 | 0.535 |
| Week 12 | 32.58±6.99 | 33.39±7.19 | 31.67±6.49 | 0.711 |
| **PCSK9 (ng/mL)** | Week 0 | 403.25±117.86 | 411.72±123.71 | 393.81±107.77 | 0.434 |
| Week 12 | 450.86±127.99 | 462.58±136.05 | 437.78±114.26 | 0.181 |
