# Supplementary material
Source: Research Square preprint supplement (doi:10.21203/rs.3.rs-8727328/v1)
Supplement: Supplementary file 4 [file 5eb820aac7752bf736c60f2e.xlsx]

## Sheet: Sheet1
Gene	Reference SNP	Genotype frequency			Allelic frequency (%)
		[N(%)]
		Wild	Wild heterozygous	Mutant homozygous	Reference Allele	Mutant allele
		homozygous
ApoA1	rs5069(G>A)	GG	GA	AA	G	A
		40(97.56)	01(2.44)	0(0)	98.79	1.21
	rs1799837(C>T)	CC	CT	TT	C	T
		48(100)	00(0)	0(0)	100	0
ApoE	rs7412(C>T)	CC	CT	TT	C	T
		49(98)	01(2)	0(0)	99	1
	rs429358(T>C)	TT	TC	CC	T	C
		50(96.15)	02(3.85)	0(0)	98.08	1.92
PCSK9	rs505151(G>A)	GG	GA	AA	G	A
		01(1.89)	9(16.98)	43(81.13)	10.38	89.62
	rs11591147(G>T)	GG	GT	TT	G	T
		55(100)	0(0)	0(0)	100	0
