# Supplementary material
Source: Research Square preprint supplement (doi:10.21203/rs.3.rs-8727328/v1)
Supplement: Supplementary file 5 [file 9698c156f80f9aea7e164c3a.xlsx]

## Sheet: Sheet1
Parameters	Weeks from baseline	Mean % change ±SD (%)
		Overall	Atorvastatin	Atorvastatin
		(N=55)	40 mg	80 mg
LDL-C	Week 1*	-23.15±9.25	-22.74±9.91	-25.55±4.37
	Week 2*	-34.01±9.63	-33.18±10.24	-38.88±2.78
	Week 4*	-44.48±11.13	-43.33±11.53	-51.25±6.12
	Week 12*	-54.55±7.88	-54.28±8.33	-56.14±5.32
TC	Week 1*	-15.76±9.92	-14.73±10.2	-21.82±6.41
	Week 2*	-24.77±11.97	-23.53±12.63	-32.04±2.88
	Week 4*	-33.75±11.60	-32.31±11.9	-42.17±5.74
	Week 12*	-40.60±9.24	-39.83±9.7	-45.12±5.01
HDL-C	Week 1*	3.79±4.94	3.47±5.01	5.66±4.7
	Week 2*	6.26±6.67	6.16±6.81	6.8±6.67
	Week 4*	7.98±8.21	7.87±8.07	8.61±10.05
	Week 12*	8.76±9.63	8.35±9.98	11.18±8.13
TG	Week 1*	-22.67±14.01	-22.62±14.89	-22.93±9.24
	Week 2*	-35.65±13.27	-35.35±14.1	-37.37±8.57
	Week 4*	-46.28±17.23	-47.63±13.26	-38.36±33.06
	Week 12*	-53.10±16.75	-52.95±17.39	-54.01±14.63
ApoA1	Week 12*	17.29±13.19	15.84±13.31	25.81±10.28
ApoE	Week 12*	-40.46±12.30	-39.54±13.02	-45.84±5.92
PCSK9	Week 12*	12.35±7.52	12.69±8.09	10.31±2.9
