# Supplementary material
Source: Research Square preprint supplement (doi:10.21203/rs.3.rs-8727328/v1)
Supplement: Supplementary file 6 [file ee4b6e7389c856cc3951a292.xlsx]

## Sheet: Sheet1
Parameters	Weeks from baseline	Biochemical values (Mean±SD)
		Overall	Males	Femal.es	p value
		(N=55)	(N=29)	(N=26)
LDL-C (mg/dL)	Week 0	176.22±43.84	177.28±46.85	175.04±39.25	0.382
	Week 1	134.13±32.46	132.59±33.81	135.85±30.13	0.666
	Week 2	114.15±24.83	111.45±26.49	117.15±21.93	0.259
	Week 4	95.67±22.57	97.34±25.41	93.81±18.21	0.101
	Week 12	78.64±19.26	81.10±20.65	75.88±16.74	0.245
TC (mg/dL)	Week 0	265.47±80.21	280.17±97.56	249.08±47.29	0.279
	Week 1	218.58±39.84	222.52±45.82	214.19±30.32	0.159
	Week 2	192.33±24.93	191.72±27.13	193.00±21.65	0.192
	Week 4	168.93±22.00	171.21±24.37	166.38±18.20	0.16
	Week 12	151.98±20.71	155.62±21.04	147.92±19.13	0.786
HDL-C (mg/dL)	Week 0	43.55±9.52	42.86±8.95	44.31±9.89	0.213
	Week 1	44.96±8.93	44.41±8.16	45.58±9.52	0.148
	Week 2	45.85±8.36	45.52±8.04	46.23±8.53	0.379
	Week 4	46.67±9.12	46.34±8.47	47.04±9.63	0.182
	Week 12	47.18±10.15	46.45±9.76	48±10.32	0.479
TG (mg/dL)	Week 0	261.96±192.70	306.41±248.06	212.38±61.86	0.141
	Week 1	193.33±105.45	211.59±132.85	172.96±51.21	0.235
	Week 2	156.36±61.48	165.90±74.31	145.73±38.45	0.257
	Week 4	130.60±60.20	139.41±60.60	120.77±56.98	0.433
	Week 12	109.65±41.13	121.14±46.56	96.85±27.99	0.131
ApoA1 (ng/mL)	Week 0	123.61±30.61	121.37±32.04	126.12±28.10	0.67
	Week 12	142.95±30.92	141.00±33.01	145.12±27.59	0.389
ApoE (ng/mL)	Week 0	56.51±15.02	58.92±15.15	53.82±14.09	0.535
	Week 12	32.58±6.99	33.39±7.19	31.67±6.49	0.711
PCSK9 (ng/mL)	Week 0	403.25±117.86	411.72±123.71	393.81±107.77	0.434
	Week 12	450.86±127.99	462.58±136.05	437.78±114.26	0.181
